# Supplementary material for: Biofilms Formed by Gram-Negative Bacteria Undergo Increased Lipid A Palmitoylation, Enhancing In Vivo Survival
Source: PubMed Central journal article supplement — mBio. 2014 Aug 19;5(4):e01116-14. doi: 10.1128/mBio.01116-14 (PMC4147861; doi:10.1128/mbio.01116-14), 2014-08-19
Supplement: mbo004141941sf01.pdf [file mbo004141941sf01.pdf]

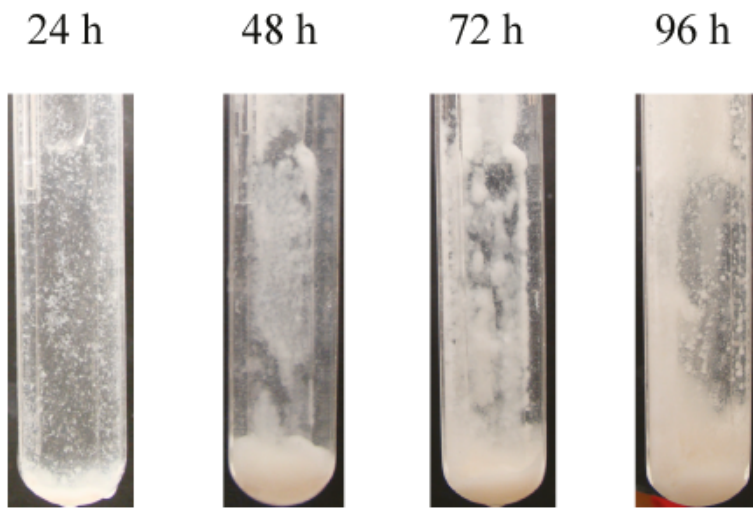

**Supplementary Figure S1. Mature biofilm formation by *E. coli* K-12 BW25113.** Pictures were taken after 24, 48, 72 and 96 h of growth on glass slides inserted into continuous-flow microfermentors.
