# Supplementary material for: Biofilms Formed by Gram-Negative Bacteria Undergo Increased Lipid A Palmitoylation, Enhancing In Vivo Survival
Source: PubMed Central journal article supplement — mBio. 2014 Aug 19;5(4):e01116-14. doi: 10.1128/mBio.01116-14 (PMC4147861; doi:10.1128/mbio.01116-14), 2014-08-19
Supplement: mbo004141941sf02.pdf [file mbo004141941sf02.pdf]

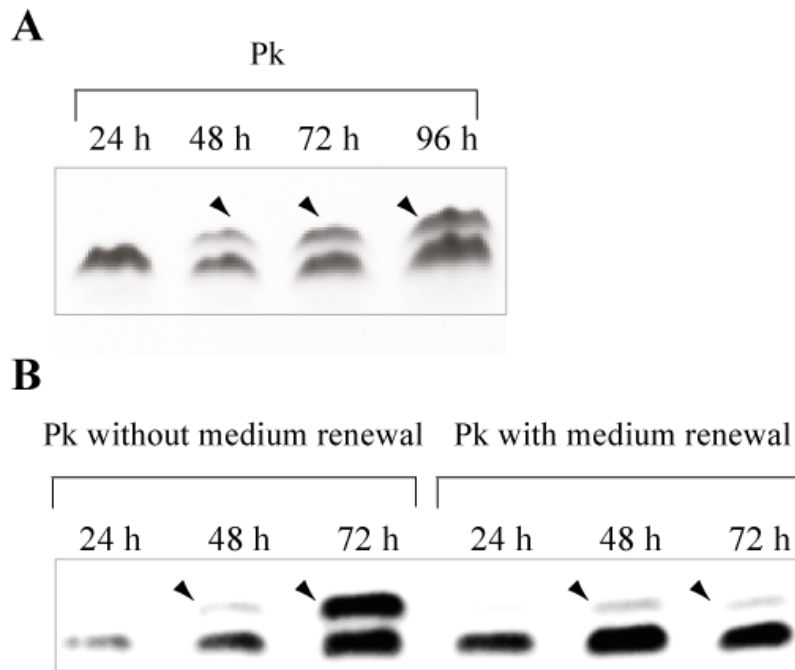

**Supplementary Figure S2. LPS modification in aging planktonic culture of *E. coli* K-12 BW25113.** (A) Tricine SDS-PAGE / periodate-silver staining analysis of LPS extracted at different time points from a planktonic culture of *E. coli* strain K-12 BW25113. The modified LPS band is indicated with a black arrow. (B) Tricine SDS-PAGE / periodate-silver staining analysis of LPS extracted at different time points similar planktonic culture of *E. coli* strain K-12 BW25113, in which growth medium was renewed every 24H by resuspension of the bacteria in fresh medium after centrifugation of the whole culture and elimination of the used medium.
