# Supplementary material for: Biofilms Formed by Gram-Negative Bacteria Undergo Increased Lipid A Palmitoylation, Enhancing In Vivo Survival
Source: PubMed Central journal article supplement — mBio. 2014 Aug 19;5(4):e01116-14. doi: 10.1128/mBio.01116-14 (PMC4147861; doi:10.1128/mbio.01116-14), 2014-08-19
Supplement: mbo004141941sf03.pdf [file mbo004141941sf03.pdf]

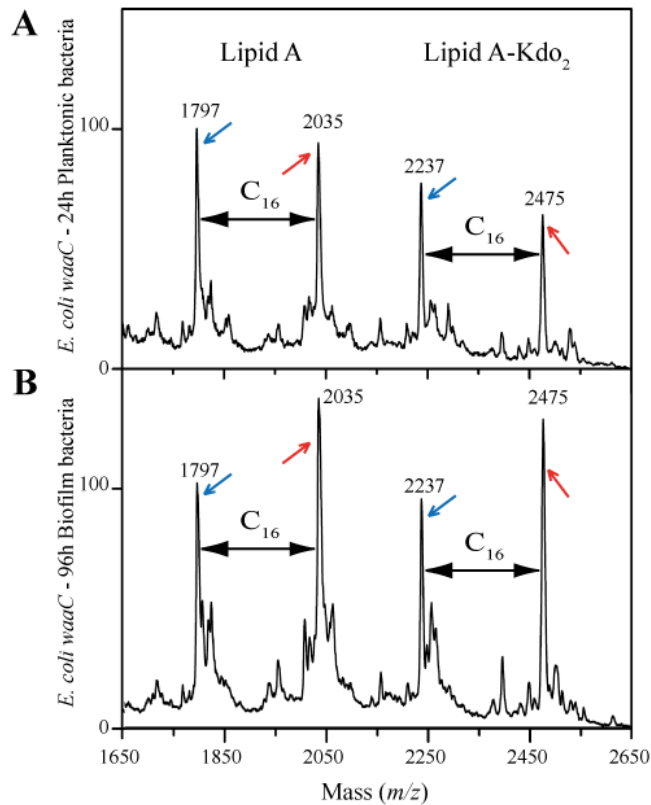

**Supplementary Figure S3. Palmitoylation is the only modification detected in biofilm of the *E. coli* K-12  $\Delta waaC$  deep rough mutant.** *E. coli* K-12  $\Delta waaC$  was grown (A) under planktonic conditions (Pk 24 h) or (B) in biofilm (Bf 96 h) and LPS was extracted and analyzed by MALDI-TOF mass spectrometry. Non-palmitoylated and palmitoylated lipid A species are indicated by blue and red arrows, respectively. Peak at  $m/z = 2035$  corresponds to palmitoylated lipid A, peak at  $m/z = 2475$  corresponds to palmitoylated lipid A-Kdo<sub>2</sub>.
