# Supplementary material for: Biofilms Formed by Gram-Negative Bacteria Undergo Increased Lipid A Palmitoylation, Enhancing In Vivo Survival
Source: PubMed Central journal article supplement — mBio. 2014 Aug 19;5(4):e01116-14. doi: 10.1128/mBio.01116-14 (PMC4147861; doi:10.1128/mbio.01116-14), 2014-08-19
Supplement: mbo004141941sf04.pdf [file mbo004141941sf04.pdf]

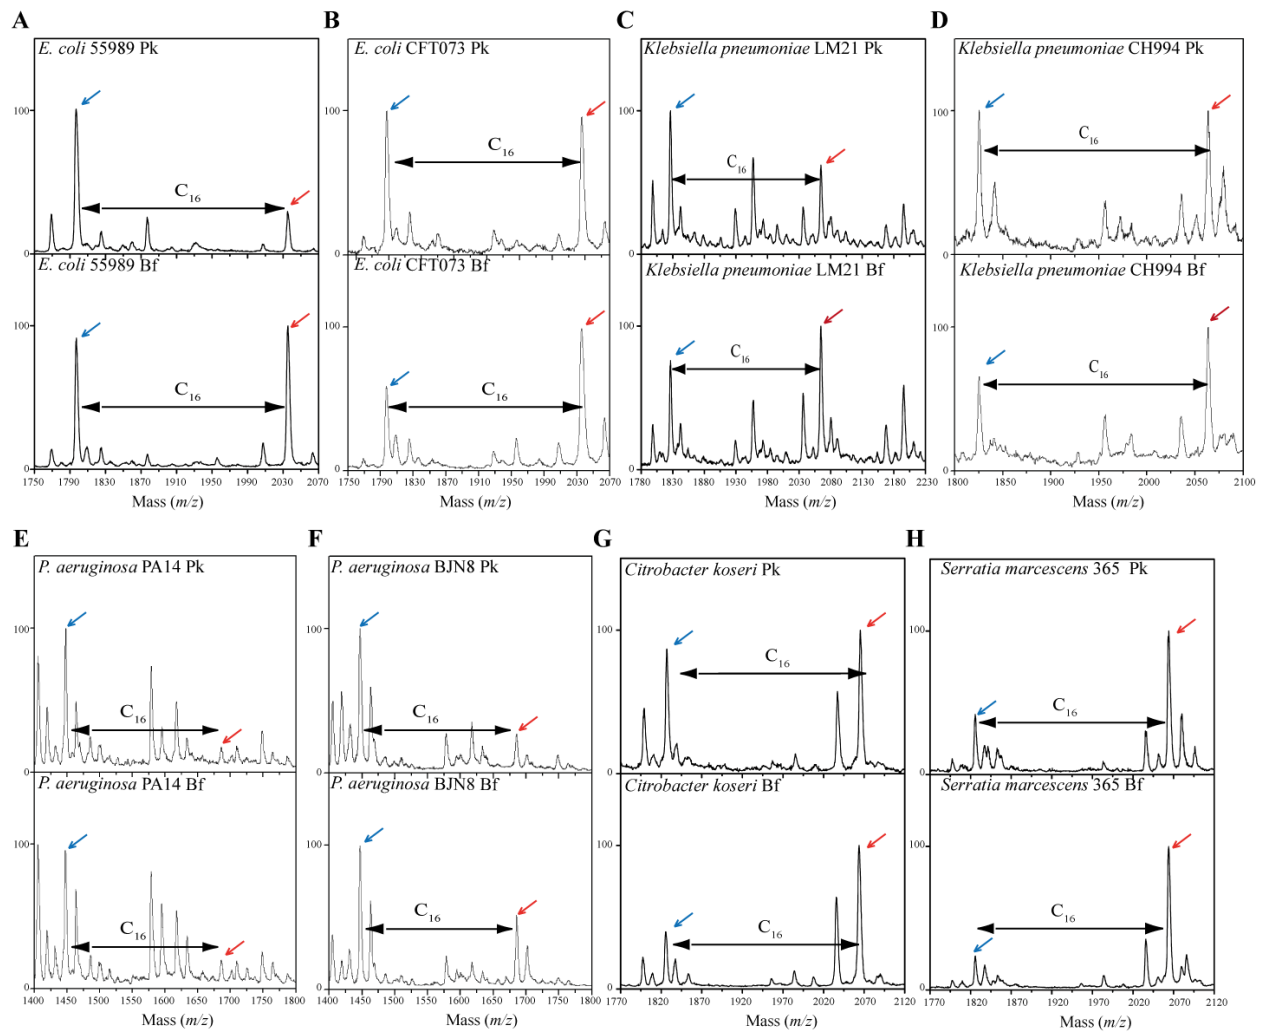

**Supplementary Figure S4. Biofilm-associated palmitoylation is common among**

**Enterobacteriaceae.** (A) *E. coli* 55989, (B) *E. coli* CFT073, (C) *Klebsiella pneumoniae* LM21, (D) *Klebsiella pneumoniae* CH994, (E) *Pseudomonas aeruginosa* PA14, (F) *Pseudomonas aeruginosa* BJN8, (G) *Citrobacter koseri* and (H) *Serratia marcescens* 365 were grown under planktonic (Pk 24 h) conditions or in biofilm (Bf 96 h).

Corresponding lipid A was extracted and analyzed by MALDI-TOF mass spectrometry. Non-palmitoylated and palmitoylated lipid A species are indicated by blue and red arrows, respectively.
