# Supplementary material for: Biofilms Formed by Gram-Negative Bacteria Undergo Increased Lipid A Palmitoylation, Enhancing In Vivo Survival
Source: PubMed Central journal article supplement — mBio. 2014 Aug 19;5(4):e01116-14. doi: 10.1128/mBio.01116-14 (PMC4147861; doi:10.1128/mbio.01116-14), 2014-08-19
Supplement: mbo004141941sf05.pdf [file mbo004141941sf05.pdf]

**A**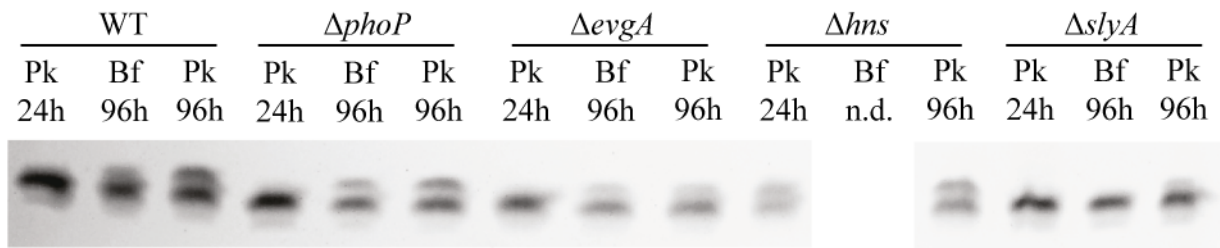**B**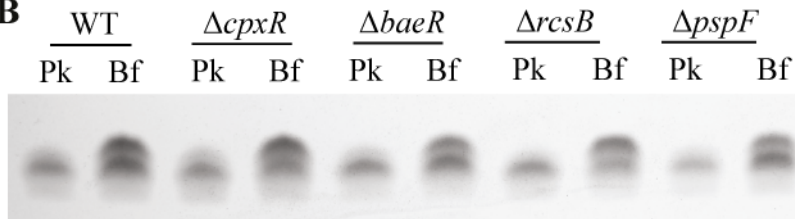**Supplementary Figure S5. Effect of deletion of regulators on lipid A**

**palmitoylation.** (A) BW25113 wild-type and mutants  $\Delta phoP$ ,  $\Delta evgA$ ,  $\Delta hns$  and  $\Delta slyA$  were grown under planktonic conditions for 24 and 96 h, and under biofilm conditions for 96 h. LPSs were analyzed by SDS-PAGE/periodate-silver staining. The *hns* mutant was strongly affected and LPS palmitoylation in biofilm could not be meaningfully tested. n. d.: not determined (B) BW25113 wild-type and mutants of stress membrane regulators  $\Delta cpxR$ ,  $\Delta baeR$ ,  $\Delta rcsB$ , and  $\Delta pspF$  were grown under planktonic conditions for 24 h and under biofilm conditions for 96 h. LPSs were analyzed by SDS-PAGE/periodate-silver staining.
