# Supplementary material for: Biofilms Formed by Gram-Negative Bacteria Undergo Increased Lipid A Palmitoylation, Enhancing In Vivo Survival
Source: PubMed Central journal article supplement — mBio. 2014 Aug 19;5(4):e01116-14. doi: 10.1128/mBio.01116-14 (PMC4147861; doi:10.1128/mbio.01116-14), 2014-08-19
Supplement: mbo004141941sf06.pdf [file mbo004141941sf06.pdf]

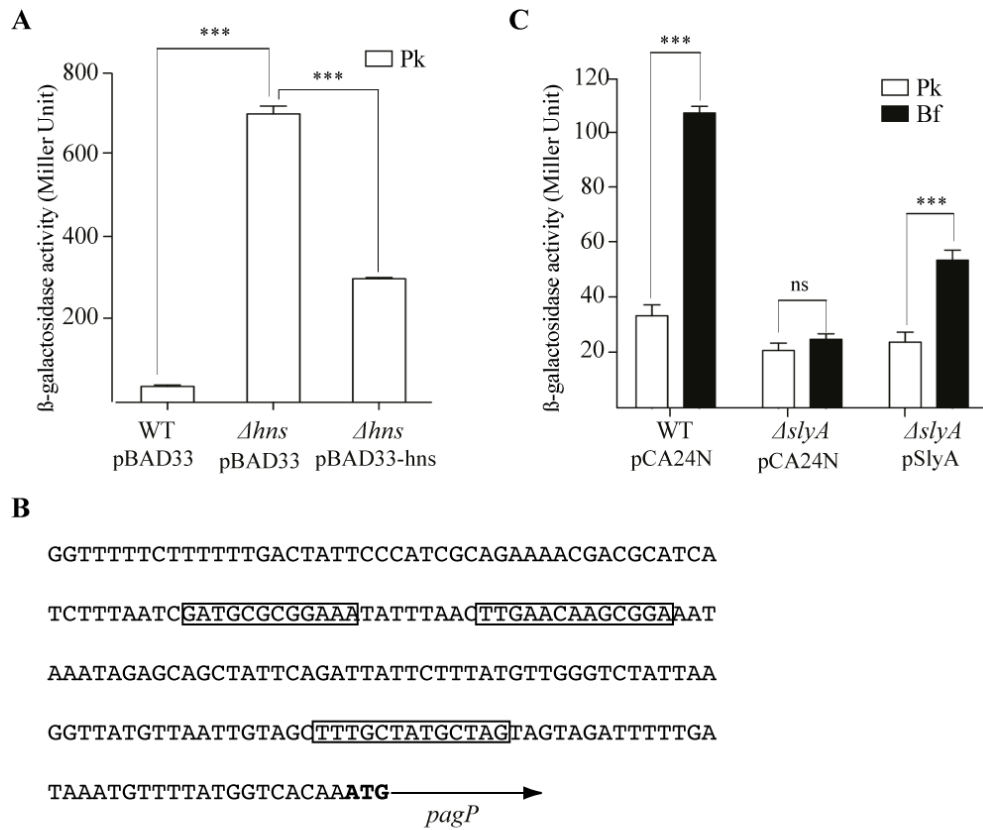

**Supplementary Figure S6. Complementation of  $\Delta hns$  and  $\Delta slyA$  mutants.** (A) *E. coli* BW25113 pBAD33, BW25113  $\Delta hns$  *pagP-lacZ* pBAD33, and BW25113  $\Delta hns$  *pagP-lacZ* pBAD33-*hns* were grown to log-phase in M63B1 0.4% glucose, then induced in M63B1 0.4% glycerol 0.2% arabinose. After 2 h of induction, expression of *pagP* was assessed by measuring  $\beta$ -galactosidase activity (miller units). (B) Promoter region of the *pagP* gene, showing putative SlyA binding sites (boxes) and SlyA binding site consensus. (C) BW25113 pCA24N, BW25113  $\Delta slyA$  *pagP-lacZ* pCA24N and BW25113  $\Delta slyA$  *pagP-lacZ* pCA24N-*slyA* were grown in planktonic cultures overnight in M63B1 0.4% glucose (Pk) or in biofilm for 96 h (Bf) in M63B1 0.4% glucose 0.1 mM isopropyl- $\beta$ -d-thiogalactopyranoside (IPTG). The average values  $\pm$  SD of three independent experiments are shown. Statistical significance was assessed using a two-tailed unpaired *t*-test (\*  $p < 0.05$ ).
