# Supplementary material for: Biofilms Formed by Gram-Negative Bacteria Undergo Increased Lipid A Palmitoylation, Enhancing In Vivo Survival
Source: PubMed Central journal article supplement — mBio. 2014 Aug 19;5(4):e01116-14. doi: 10.1128/mBio.01116-14 (PMC4147861; doi:10.1128/mbio.01116-14), 2014-08-19
Supplement: mbo004141941sf07.pdf [file mbo004141941sf07.pdf]

**A**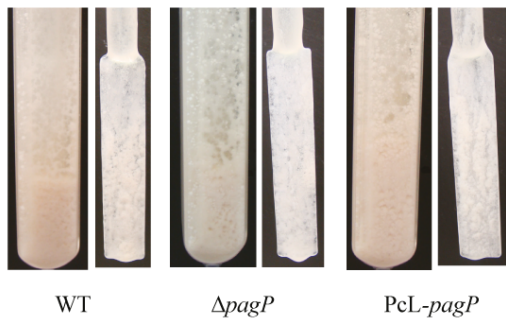**B**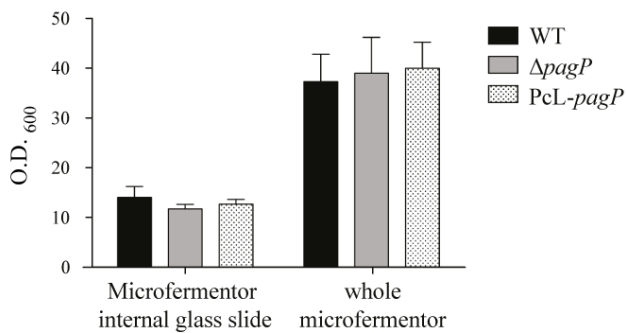**C**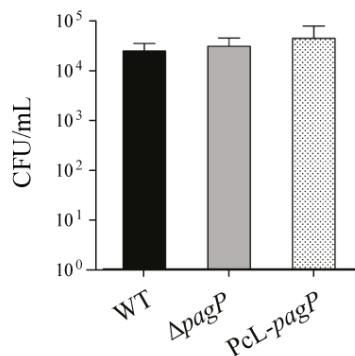

**Supplementary Figure S7. Lipid A palmitoylation effect on bacterial adhesion.** (A) Biofilms of *E. coli* 55989 wild-type,  $\Delta pagP$  and PcL- $pagP$  were grown in continuous-flow microfermentors for 96 h. Images of the biofilm formed in a microfermentor and on an internal glass slide. (B) Biofilms formed in the microfermentor and on the internal glass slide were resuspended and optical density at 600 nm was measured ( $n = 3$ ). (C) Palmitoylation had no effect on initial adhesion to TIVAPs *in vivo*. TIVAPs implanted in rats were inoculated with bioluminescent *E. coli* 55989, 55989  $\Delta pagP$ , or 55989 PcL- $pagP$ . Three hours after inoculation, TIVAPs were surgically removed and the biofilm biomass was assessed by CFU count ( $n = 4$ ).
