# Supplementary material for: Biofilms Formed by Gram-Negative Bacteria Undergo Increased Lipid A Palmitoylation, Enhancing In Vivo Survival
Source: PubMed Central journal article supplement — mBio. 2014 Aug 19;5(4):e01116-14. doi: 10.1128/mBio.01116-14 (PMC4147861; doi:10.1128/mbio.01116-14), 2014-08-19
Supplement: mbo004141941sf08.pdf [file mbo004141941sf08.pdf]

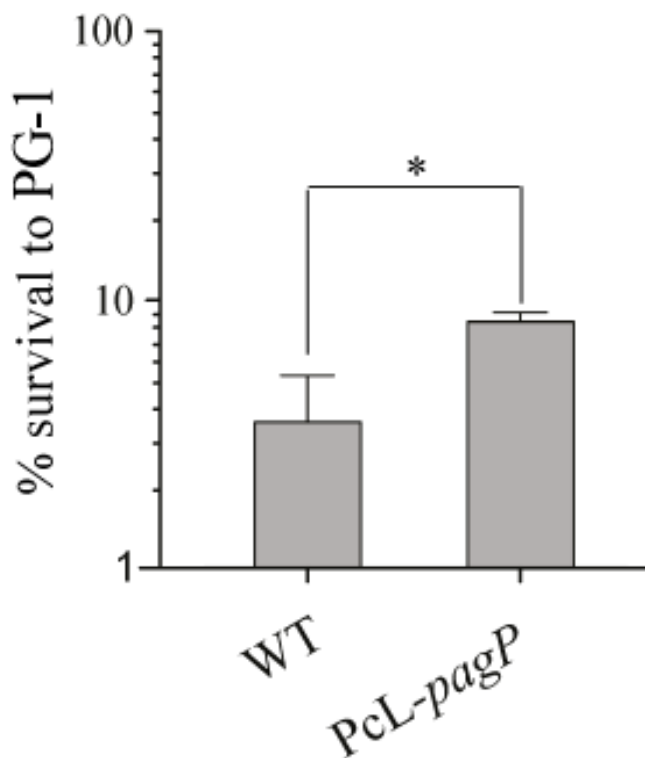

1  
2  
3  
4  
5  
6  
7  
8  
9  
10  
11

**Supplementary Figure S8. PG-1 antimicrobial peptide sensitivity assay.** To assess the resistance of *E. coli* 55989 wild-type and Pcl-*pagP* strains to protegrin-1 (PG-1) peptide (AnaSpec, Fremont, CA), bacterial biofilms were grown on PVC microtiter plates for 24 h in M63B1 medium supplemented with 0.4 % glucose. Planktonic bacteria were then removed by washing the wells twice. M63B1 medium supplemented with glucose with or without 20  $\mu\text{g}/\text{mL}$  PG-1 was then added to the wells and incubated at 37°C for 24 h. Wells were washed, biofilms were collected and bacterial survival was determined by CFU counts ( $n = 3$ ). Statistical significance was assessed using a two-tailed unpaired *t*-test (\*  $p < 0.05$ ).
