# Supplementary material for: Biofilms Formed by Gram-Negative Bacteria Undergo Increased Lipid A Palmitoylation, Enhancing In Vivo Survival
Source: PubMed Central journal article supplement — mBio. 2014 Aug 19;5(4):e01116-14. doi: 10.1128/mBio.01116-14 (PMC4147861; doi:10.1128/mbio.01116-14), 2014-08-19
Supplement: mbo004141941st1.pdf [file mbo004141941st1.pdf]

**Table S1.** Strains and plasmids used in this study

| Strains and plasmids                   | Relevant characteristics                                                                                                                                                   | Reference / source     |
|----------------------------------------|----------------------------------------------------------------------------------------------------------------------------------------------------------------------------|------------------------|
| <b>Strains</b>                         |                                                                                                                                                                            |                        |
| <i>Escherichia coli</i>                |                                                                                                                                                                            |                        |
| BW25113                                | <i>E. coli</i> K-12 derivative                                                                                                                                             | Keio collection        |
| BW25113 $\Delta waaC$                  | $\Delta waaC::KmFRT$ , $Km^R$                                                                                                                                              | Keio collection<br>(1) |
| BW25113 $\Delta pagP$                  | $\Delta pagP::FRT$ , flipping from BW25113                                                                                                                                 | This study             |
| BW25113 PcL- <i>pagP</i>               | $\Delta pagP::KmFRT$ from Keio collection<br><i>pagP</i> with its own RBS sequence placed under the control of the <i>ampPcL</i> cassette $\lambda_{pR}$ promoter; $Amp^R$ | This study             |
| BW25113 <i>pagP-lacZ</i>               | <i>lacZzeo</i> cassette inserted on the chromosome downstream of <i>pagP</i> gene; $Zeo^R$                                                                                 | This study             |
| BW25113 $\Delta phoP$ <i>pagP-lacZ</i> | $\Delta phoP::KmFRT$ in BW25113 <i>pagP-lacZ</i> ; $Km^R$ $Zeo^R$                                                                                                          | This study             |
| BW25113 $\Delta evgA$ <i>pagP-lacZ</i> | $\Delta evgA::KmFRT$ in BW25113 <i>pagP-lacZ</i> ; $Km^R$ $Zeo^R$                                                                                                          | This study             |
| BW25113 $\Delta hns$ <i>pagP-lacZ</i>  | $\Delta hns::KmFRT$ in BW25113 <i>pagP-lacZ</i> ; $Km^R$ $Zeo^R$                                                                                                           | This study             |
| BW25113 $\Delta slyA$ <i>pagP-lacZ</i> | $\Delta slyA::KmFRT$ in BW25113 <i>pagP-lacZ</i> ; $Km^R$ $Zeo^R$                                                                                                          | This study             |
| BW25113 <i>slyA-lacZ</i>               | <i>lacZzeo</i> cassette inserted on the chromosome downstream of <i>slyA</i> gene; $Zeo^R$                                                                                 | This study             |
| 55989                                  | <i>In vitro</i> and <i>in vivo</i> biofilm-forming<br>Enteroaggregative <i>E. coli</i>                                                                                     | (2) (3) (4)            |
| 55989 $\Delta pagP$                    | $\Delta pagP::KmFRT$ , $Km^R$                                                                                                                                              | This study             |
| 55989 PcL- <i>pagP</i>                 | <i>pagP</i> with its own RBS sequence placed under the control of the <i>ampPcL</i> cassette $\lambda_{pR}$ promoter; $Amp^R$                                              | This study             |
| O42                                    | Enteroaggregative <i>E. coli</i>                                                                                                                                           | (5)                    |
| 536                                    | Uropathogenic <i>E. coli</i>                                                                                                                                               | (6)                    |
| CFT073                                 | Uropathogenic <i>E. coli</i>                                                                                                                                               | (7)                    |
| <i>Citrobacter koseri</i> U5           | Clinical isolate                                                                                                                                                           | Lab.collection         |
| <i>Serratia marcescens</i> SM365       | Environmental isolate                                                                                                                                                      | V. Braun               |
| <i>Klebsiella pneumoniae</i> LM21      | Clinicate isolate; serogroup O25; ApR                                                                                                                                      | (8)                    |
| <i>Klebsiella pneumoniae</i> CH994     | Clinical strain isolated from bronchial sampling                                                                                                                           | C. Forestier           |
| <i>Klebsiella pneumoniae</i> CH995     | Clinical strain isolated from flat surgical drain                                                                                                                          | C. Forestier           |
| <i>Klebsiella pneumoniae</i> CH996     | Clinical strain isolated from urinary catheter                                                                                                                             | C. Forestier           |
| <i>Pseudomonas aeruginosa</i> PA14     | Clinical isolate                                                                                                                                                           | Lab. collection        |
| <i>Pseudomonas aeruginosa</i> BJN8     | Clinical strain isolated from catheter-related infection                                                                                                                   | V.Leflon               |
| <i>Pseudomonas aeruginosa</i> BJN33    | Clinical strain isolated from catheter-related infection                                                                                                                   | V.Leflon               |
| <i>Pseudomonas aeruginosa</i> BJN53    | Clinical strain isolated from catheter-related infection                                                                                                                   | V.Leflon               |
| <b>Plasmids</b>                        |                                                                                                                                                                            |                        |
| pSC189                                 | Plasmid bearing the <i>mariner</i> transposon TnSC189; R6 <i>Kori</i> ; $Amp^R$ $Km^R$                                                                                     | (9)                    |
| pKOBEG                                 | pSC101 ts (replicates at 30°C); <i>araC</i> , arabinose-inducible $\lambda red\gamma\beta\alpha$ operon; $Cm^R$                                                            | (10)                   |
| pKOBEGA                                | Like pKOBEG, but $Amp^R$                                                                                                                                                   | (10)                   |
| pCP20                                  | Plasmid bearing the <i>flp</i> recombinase gene; 30°C replication; $Cm^R$ $Amp^R$                                                                                          | (11)                   |
| pAT881                                 | pGB2 $\Omega P_{ami}luxABCDE$                                                                                                                                              | (12)                   |
| pAC24N                                 | IPTG-inducible $p_{T5-lac}$ promoter; $Cm^R$                                                                                                                               | (13)                   |
| pPagP                                  | pCA24N $p_{T5-lac}::pagP$ ; $Cm^R$                                                                                                                                         | (13)                   |
| pSlyA                                  | pCA24N $p_{T5-lac}::slyA$ ; $Cm^R$                                                                                                                                         | (13)                   |
| pBAD33                                 | Arabinose-inducible $p_{BAD}$ promoter; $Cm^R$                                                                                                                             | (14)                   |
| pBAD33- <i>hns</i>                     | Arabinose-inducible <i>hns</i> ; $Cm^R$                                                                                                                                    | (15)                   |

1. **Baba T, Ara T, Hasegawa M, Takai Y, Okumura Y, Baba M, Datsenko KA, Tomita M, Wanner BL, Mori H.** 2006. Construction of Escherichia coli K-12 in-frame, single-gene knockout mutants: the Keio collection. *Molecular systems biology* **2**:2006 0008.
2. **Bernier C, Gounon P, Le Bouguenec C.** 2002. Identification of an aggregative adhesion fimbria (AAF) type III-encoding operon in enteroaggregative Escherichia coli as a sensitive probe for detecting the AAF-encoding operon family. *Infect Immun* **70**:4302-4311.
3. **Da Re S, Valle J, Charbonnel N, Beloin C, Latour-Lambert P, Faure P, Turlin E, Le Bouguenec C, Renauld-Mongenie G, Forestier C, Ghigo JM.** 2013. Identification of Commensal Escherichia coli Genes Involved in Biofilm Resistance to Pathogen Colonization. *PLoS one* **8**:e61628.
4. **Chauhan A, Lebeaux D, Ghigo JM, Beloin C.** 2012. Full and Broad-Spectrum In Vivo Eradication of Catheter-Associated Biofilms Using Gentamicin-EDTA Antibiotic Lock Therapy. *Antimicrobial agents and chemotherapy* **56**:6310-6318.
5. **Nataro JP, Deng Y, Cookson S, Cravioto A, Savarino SJ, Guers LD, Levine MM, Tacket CO.** 1995. Heterogeneity of enteroaggregative Escherichia coli virulence demonstrated in volunteers. *The Journal of infectious diseases* **171**:465-468.
6. **Berger H, Hacker J, Juarez A, Hughes C, Goebel W.** 1982. Cloning of the chromosomal determinants encoding hemolysin production and mannose-resistant hemagglutination in Escherichia coli. *Journal of bacteriology* **152**:1241-1247.
7. **Mobley HL, Green DM, Trifillis AL, Johnson DE, Chippendale GR, Lockett CV, Jones BD, Warren JW.** 1990. Pyelonephritogenic Escherichia coli and killing of cultured human renal proximal tubular epithelial cells: role of hemolysin in some strains. *Infection and immunity* **58**:1281-1289.
8. **Favre-Bonte S, Joly B, Forestier C.** 1999. Consequences of reduction of Klebsiella pneumoniae capsule expression on interactions of this bacterium with epithelial cells. *Infection and immunity* **67**:554-561.
9. **Chiang SL, Rubin EJ.** 2002. Construction of a mariner-based transposon for epitope-tagging and genomic targeting. *Gene* **296**:179-185.
10. **Chaverocche MK, Ghigo JM, d'Enfert C.** 2000. A rapid method for efficient gene replacement in the filamentous fungus Aspergillus nidulans. *Nucleic acids research* **28**:E97.
11. **Cherepanov PP, Wackernagel W.** 1995. Gene disruption in Escherichia coli: TcR and KmR cassettes with the option of F1p-catalyzed excision of the antibiotic-resistance determinant. *Gene* **158**:9-14.
12. **Foucault ML, Thomas L, Goussard S, Branchini BR, Grillot-Courvalin C.** 2010. In vivo bioluminescence imaging for the study of intestinal colonization by Escherichia coli in mice. *Applied and environmental microbiology* **76**:264-274.
13. **Kitagawa M, Ara T, Arifuzzaman M, Ioka-Nakamichi T, Inamoto E, Toyonaga H, Mori H.** 2005. Complete set of ORF clones of Escherichia coli ASKA library (a complete set of E. coli K-12 ORF archive): unique resources for biological research. *DNA research : an international journal for rapid publication of reports on genes and genomes* **12**:291-299.
14. **Guzman LM, Belin D, Carson MJ, Beckwith J.** 1995. Tight regulation, modulation, and high-level expression by vectors containing the arabinose PBAD promoter. *Journal of bacteriology* **177**:4121-4130.
15. **Deighan P, Beloin C, Dorman CJ.** 2003. Three-way interactions among the Sfh, StpA and H-NS nucleoid-structuring proteins of Shigella flexneri 2a strain 2457T. *Mol Microbiol* **48**:1401-1416.
