# Supplementary material for: Biofilms Formed by Gram-Negative Bacteria Undergo Increased Lipid A Palmitoylation, Enhancing In Vivo Survival
Source: PubMed Central journal article supplement — mBio. 2014 Aug 19;5(4):e01116-14. doi: 10.1128/mBio.01116-14 (PMC4147861; doi:10.1128/mbio.01116-14), 2014-08-19
Supplement: mbo004141941st2.pdf [file mbo004141941st2.pdf]

**Table S2.** Primers used in this study

| Target gene                                                | Primer name          | Sequence (5'- 3')                                               |
|------------------------------------------------------------|----------------------|-----------------------------------------------------------------|
| Primers used to generate <i>ampPcL</i> cassette insertions |                      |                                                                 |
| <i>pagP</i>                                                | pagP.500-5           | caagaaaaactgccattaagac                                          |
|                                                            | pagP.ampPcLrbs.L-5   | cattaaagaggagaaaggtaccgcatgaacgtgagtaaatatgtcgt                 |
|                                                            | pagP.ampPcLrbs.L-3   | gtgagaattactaacttgagcgaattgtgaccataaacatttatcaa                 |
|                                                            | inspagP.500-3        | ggatcatctgaaaagtcactg                                           |
| Primers used to generate <i>lacZ</i> fusions               |                      |                                                                 |
| <i>pagP</i>                                                | endpagP.lacZzeo.Lg-5 | tactttgcctggatgcgctttcagtttgagacaaatgaaatttcacacaggaaacagctatga |
|                                                            | endpagP.lacZzeo.Lg-3 | tacttattagctattgatTTTaaagaagtactaaaactcagtcctgctcctcgccacgaa    |
| <i>slyA</i>                                                | endslyA.lacZzeo.Lg-5 | aatatcattgagttacaggccaaagggtagacaaatgaaatttcacacaggaaacagctatga |
|                                                            | endslyA.lacZzeo.Lg-3 | ttgcgtgtggtcaggttactgaccacacgcccccttcatttcagtcctgctcctcgccacgaa |
| Primers used to generate deletion mutants                  |                      |                                                                 |
| <i>pagP</i> <sub>BW25113</sub>                             | pagP.500-5           | caagaaaaactgccattaagac                                          |
|                                                            | pagP.CmFRT.L-5       | taggaactcggaaataggaactaagacaaatgaagtttagtaacttct                |
|                                                            | pagP.CmFRT.L-3       | ttcgaagcagctccagcctacacattgtgaccataaacatttatcaa                 |
|                                                            | pagP.500-3           | caaccttctggggtcttttg                                            |
| <i>pagP</i> <sub>55989</sub>                               | pagP.500-5           | caagaaaaactgccattaagac                                          |
|                                                            | pagP55989.KmFRT.L-5  | gaactcggaaataggaactaagacaaatgaagtttagtaacttcttaa                |
|                                                            | pagP55989.KmFRT.L-3  | gaagcagctccagcctacacacattgtgaccataaacatttatcaaaa                |
|                                                            | pagP55989.500-3      | aaccttctggggtctttgc                                             |
